# Supplementary material for: No Long-Term Decrease in Caterpillar Availability for Invertivorous Birds in Deciduous Forests in Hungary
Source: MDPI journal article supplement (doi:10.3390/f12081070), 2021-08-11
Supplement: s1 [file s1]

## Supplementary material to the paper

## No long-term decrease in caterpillar availability for invertivorous birds in deciduous forests in Hungary

by Csaba Béla Eötvös, Anikó Hirka, László Gimesi, Gábor L. Lövei, Csaba Gáspár and György Csóka

**Table S1.** The list of species included in our analysis, their seasonal presence, larval size and host plant.

| Family/Species                                                  | Presence (months) of |        | Overwintering stage | Lag (year) | Estimated larval |               |                | Host plant (genus)                 |
|-----------------------------------------------------------------|----------------------|--------|---------------------|------------|------------------|---------------|----------------|------------------------------------|
|                                                                 | Caterpillar          | Adults |                     |            | Length (mm)      | Diameter (mm) | Body mass (mg) |                                    |
| <u>Drepanidae</u>                                               |                      |        |                     |            |                  |               |                |                                    |
| <i>Achlya flavicornis</i> (Linnaeus, 1758)                      | 04-06                | 03-04  | Pupa                | 1          | 31               | 4             | 390            | <i>Betula</i>                      |
| <i>Cymatophorina diluta</i> ([Dennis & Schiffermüller] 1775)    | 05-06                | 08-10  | Egg                 | 0          | 26               | 4             | 327            | <i>Quercus</i>                     |
| <i>Polyploca ridens</i> (Fabricius, 1787)                       | 05-06                | 03-04  | Pupa                | 1          | 33               | 5             | 648            | <i>Quercus</i>                     |
| <u>Geometridae</u>                                              |                      |        |                     |            |                  |               |                |                                    |
| <i>Agriopis aurantiaria</i> (Hübner, 1799)*                     | 05-06                | 10-12  | Egg                 | 0          | 29               | 3             | 205            | <i>Quercus, Carpinus, Acer</i>     |
| <i>Agriopis bajaria</i> ([Dennis & Schiffermüller] 1775)*       | 04-06                | 10-11  | Egg                 | 0          | 33               | 3             | 233            | <i>Prunus, Malus, Crataegus</i>    |
| <i>Agriopis leucophaearia</i> ([Dennis & Schiffermüller] 1775)* | 04-06                | 02-04  | Pupa                | 1          | 25               | 3             | 177            | <i>Quercus, Populus</i>            |
| <i>Agriopis marginaria</i> (Borkhausen, 1777)*                  | 05-06                | 02-04  | Egg                 | 1          | 29               | 3             | 205            | <i>Quercus, Fagus, Populus</i>     |
| <i>Alcis repandata</i> (Linnaeus, 1758)                         | 07-W-05              | 05-08  | Larva               | 0          | 37               | 3             | 262            | <i>Quercus, Carpinus, Prunus</i>   |
| <i>Alsophila aceraria</i> ([Dennis & Schiffermüller] 1775)*     | 05-07                | 10-12  | Egg                 | 0          | 26               | 3             | 184            | <i>Quercus, Fagus, Acer</i>        |
| <i>Alsophila aescularia</i> ([Dennis & Schiffermüller] 1775)*   | 04-06                | 02-04  | Pupa                | 1          | 26               | 3             | 184            | <i>Quercus, Corylus, Crataegus</i> |
| <i>Apocheima hispidaria</i> ([Dennis & Schiffermüller] 1775)    | 04-06                | 02-04  | Pupa                | 1          | 39               | 4             | 490            | <i>Quercus, Carpinus, Alnus</i>    |
| <i>Biston strataria</i> (Hufnagel, 1766)                        | 05-07                | 02-04  | Pupa                | 1          | 54               | 5             | 1060           | <i>Quercus, Acer, Tilia</i>        |
| <i>Colotois pennaria</i> (Linnaeus, 1761)*                      | 05-07                | 09-11  | Egg                 | 0          | 55               | 5             | 1080           | <i>Quercus, Carpinus, Tilia</i>    |
| <i>Comibaena bajularia</i> ([Dennis & Schiffermüller] 1775)     | 07-W-05              | 05-07  | Larva               | 0          | 19               | 4             | 239            | <i>Quercus</i>                     |
| <i>Ennomos autumnaria</i> (Werneburg, 1859)*                    | 05-06                | 08-10  | Egg                 | 0          | 50               | 3             | 353            | <i>Quercus, Tilia, Alnus</i>       |
| <i>Epirrita christyi</i> (Allen, 1906)*                         | 05-06                | 09-11  | Egg                 | 0          | 21               | 4             | 264            | <i>Quercus, Acer, Fraxinus</i>     |

| Family/Species                                              | Presence (months) of |        | Overwintering stage | Lag (year) | Estimated larval |               |                | Host plant (genus)                  |
|-------------------------------------------------------------|----------------------|--------|---------------------|------------|------------------|---------------|----------------|-------------------------------------|
|                                                             | Caterpillar          | Adults |                     |            | Length (mm)      | Diameter (mm) | Body mass (mg) |                                     |
| <i>Epirrita dilutata</i> ([Dennis & Schiffermüller] 1775)*  | 05-06                | 09-11  | Egg                 | 0          | 21               | 4             | 264            | <i>Quercus, Carpinus, Crataegus</i> |
| <i>Erannis defoliaria</i> (Clerck, 1759)*                   | 05-06                | 10-12  | Egg                 | 0          | 30               | 4             | 377            | <i>Quercus, Carpinus, Tilia</i>     |
| <i>Lycia hirtaria</i> (Clerck, 1759)                        | 05-07                | 03-05  | Pupa                | 1          | 54               | 5             | 1060           | <i>Quercus, Tilia, Prunus</i>       |
| <i>Operophtera brumata</i> (Linnaeus, 1758)*                | 04-06                | 10-12  | Egg                 | 0          | 19               | 3             | 134            | <i>Quercus, Carpinus, Malus</i>     |
| <i>Phigalia pilosaria</i> ([Dennis & Schiffermüller] 1775)  | 04-06                | 02-04  | Pupa                | 1          | 40               | 4             | 503            | <i>Quercus, Carpinus, Acer</i>      |
| <u>Lasiocampidae</u>                                        |                      |        |                     |            |                  |               |                |                                     |
| <i>Malacosoma neustria</i> (Linnaeus, 1758)*                | 05-06                | 06-08  | Egg                 | 0          | 53               | 5             | 1041           | <i>Quercus, Prunus, Malus</i>       |
| <i>Pocilocampa populi</i> (Linnaeus, 1758)                  | 05-07                | 10-12  | Egg                 | 0          | 45               | 5             | 884            | <i>Quercus, Prunus, Populus</i>     |
| <u>Noctuidae</u>                                            |                      |        |                     |            |                  |               |                |                                     |
| <i>Agrochola helvola</i> (Linnaeus, 1758)                   | 04-06                | 08-10  | Egg                 | 0          | 43               | 5             | 844            | <i>Quercus, Prunus, Salix</i>       |
| <i>Amphipyra berbera</i> (Rungs, 1949)                      | 04-06                | 07-10  | Egg                 | 0          | 40               | 8             | 2011           | <i>Quercus, Carpinus, Tilia</i>     |
| <i>Amphipyra pyramidea</i> (Linnaeus, 1758)                 | 04-06                | 07-10  | Egg                 | 0          | 40               | 8             | 2011           | <i>Quercus, Carpinus, Tilia</i>     |
| <i>Anorthoa munda</i> ([Dennis & Schiffermüller] 1775)*     | 05-06                | 03-05  | Pupa                | 1          | 38               | 5             | 746            | <i>Quercus, Carpinus, Tilia</i>     |
| <i>Asteroscopus sphinx</i> (Hufnagel, 1766)                 | 05-06                | 09-10  | Egg                 | 0          | 46               | 9             | 2926           | <i>Quercus, Carpinus, Fagus</i>     |
| <i>Catocala nymphagoga</i> (Linnaeus, 1787)                 | 05-06                | 06-08  | Egg                 | 0          | 43               | 4             | 540            | <i>Quercus</i>                      |
| <i>Catocala promissa</i> ([Dennis & Schiffermüller] 1775)   | 05-06                | 06-08  | Egg                 | 0          | 50               | 7             | 1924           | <i>Quercus</i>                      |
| <i>Catocala sponsa</i> (Linnaeus, 1767)                     | 05-06                | 07-08  | Egg                 | 0          | 55               | 8             | 2765           | <i>Quercus</i>                      |
| <i>Cosmia trapezina</i> (Linnaeus, 1758)*                   | 05-06                | 06-09  | Egg                 | 0          | 30               | 4             | 377            | <i>Quercus, Prunus, Corylus</i>     |
| <i>Dichonia convergens</i> ([Dennis & Schiffermüller] 1775) | 05-06                | 09-10  | Egg                 | 0          | 48               | 8             | 2413           | <i>Quercus</i>                      |
| <i>Dicycla oo</i> (Linnaeus, 1758)                          | 05-06                | 06-07  | Egg                 | 0          | 36               | 5             | 707            | <i>Quercus</i>                      |
| <i>Dryobotodes eremita</i> (Fabricius, 1775)*               | 04-06                | 09-10  | Egg                 | 0          | 38               | 7             | 1462           | <i>Quercus</i>                      |
| <i>Griposia aprilina</i> (Linnaeus, 1758)                   | 05-06                | 09-10  | Egg                 | 0          | 48               | 8             | 2413           | <i>Quercus</i>                      |
| <i>Orthosia cerasi</i> (Fabricius, 1775)*                   | 05-06                | 03-05  | Pupa                | 1          | 38               | 7             | 1462           | <i>Quercus, Salix, Ulmus</i>        |
| <i>Orthosia cruda</i> ([Dennis & Schiffermüller] 1775)*     | 05-06                | 03-05  | Pupa                | 1          | 30               | 5             | 589            | <i>Quercus, Betula, Acer</i>        |
| <i>Orthosia gothica</i> (Linnaeus, 1758)*                   | 05-06                | 03-05  | Pupa                | 1          | 45               | 7             | 1732           | <i>Quercus, Tilia, Prunus</i>       |

| Family/Species                                                | Presence (months) of |        | Overwintering stage | Lag (year) | Estimated larval |               |                | Host plant (genus)              |
|---------------------------------------------------------------|----------------------|--------|---------------------|------------|------------------|---------------|----------------|---------------------------------|
|                                                               | Caterpillar          | Adults |                     |            | Length (mm)      | Diameter (mm) | Body mass (mg) |                                 |
| <i>Orthosia incerta</i> (Hufnagel, 1766)*                     | 05-06                | 03-05  | Pupa                | 1          | 40               | 6             | 1131           | <i>Quercus, Prunus, Populus</i> |
| <i>Orthosia miniosa</i> ([Dennis & Schiffermüller] 1775)*     | 05-06                | 03-05  | Pupa                | 1          | 36               | 5             | 707            | <i>Quercus, Betula, Acer</i>    |
| <u>Notodontidae</u>                                           |                      |        |                     |            |                  |               |                |                                 |
| <i>Peridea anceps</i> (Goeze 1781)                            | 05-07                | 04-06  | Pupa                | 1          | 43               | 7             | 1655           | <i>Quercus</i>                  |
| <i>Ptilophora plumigera</i> ([Dennis & Schiffermüller] 1775)* | 05-07                | 10-12  | Egg                 | 0          | 35               | 5             | 687            | <i>Acer</i>                     |

\* Can be considered as pest
